# Supplementary material for: Ageratina adenophora induces mice hepatotoxicity via ROS-NLRP3-mediated pyroptosis
Source: PubMed Central journal article supplement (PMC6207671; doi:10.1038/s41598-018-34492-7), 2018-10-30
Supplement: 41598_2018_34492_MOESM1_ESM.pdf [file 41598_2018_34492_MOESM1_ESM.pdf]

## Supplementary Data

### ***Ageratina adenophora* induce mice hepatotoxicity via ROS-NLRP3-mediated pyroptosis**

Wei Sun <sup>1,2, ¶</sup>, Jie Fu <sup>1, ¶</sup>, Shanshan Liu <sup>2, ¶</sup>, Liwen Hu <sup>1</sup>, Zhen Shi <sup>1</sup>, Dong Yue <sup>1</sup>, Zhihua Ren<sup>1</sup>, Zhijun Zhong<sup>1</sup>, Zhicai Zuo<sup>1</sup>, Suizhong Cao<sup>1</sup>, Guangneng Peng<sup>1</sup>, Junliang Deng<sup>1</sup>, and Yanchun Hu <sup>1,\*</sup>

<sup>1</sup>Key Laboratory of Animal Disease and Human Health of Sichuan Province, College of Veterinary Medicine, Sichuan Agricultural University, Wenjiang District, Chengdu City, Sichuan, 611130, China.

<sup>2</sup>Tongren Polytechnic College, Bijiang District, Tongren City, Guizhou, 554300, China.

¶Wei Sun, Jie Fu and Shanshan Liu contributed equally to this work.

\*Correspondence to Y.H. (email: [hychun114@163.com](mailto:hychun114@163.com)).

**Table S1.** The primers sequences used for qRT-PCR

| Items          | Sense sequence          | Antisense sequence       | Product size |
|----------------|-------------------------|--------------------------|--------------|
| IL-1 $\beta$   | TCGCAGCAGCACATCAACAAGAG | TGTCATGTCCTCATCTGGAAGG   | 118          |
| GSDMD          | ACTGAGGTCCACAGCCAAGAGG  | GCCACTCGGAATGCCAGGATG    | 140          |
| Caspase-1      | ACAACCACTCGTACACGTCTTGC | CCAGATCCTCCAGCAGCAACTTC  | 118          |
| NF- $\kappa$ B | ATCCACCTACCCGGCCTCATC   | TTCGCTGGCTAATGGCTTGCTC   | 162          |
| NLRP3          | GAGCTGGACCTCAGTGACAATGC | ACCAATGCGAGATCCTGACAACAC | 146          |
| $\beta$ -actin | CCTAGGCACCAGGGTGTGAT    | TCCATGTCGTCCCAGTTGGT     | 137          |

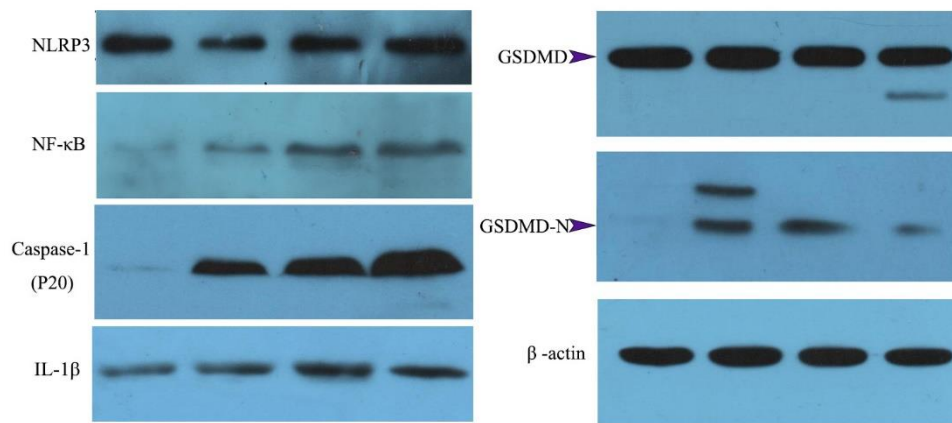

Figure-S1. Blots used for Figure 5a. All images were converted into 8-bit type by using ImageJ software. The exposure time of all images were range from 1 to 3 min. NLRP3 (114 kD), NF-κB (60 kD) and IL-1 β (17 kD) in panel I, II and VI were cropped from the same gel with exposure time of 2 mins. Caspase-1 p20 (45 kD), GSDMD (55 kD), GSDMD-N (35 kD) and β-actin (43 kD) were grouped in panel III, IV, V and VII, respectively.
